# Supplementary material for: EARLY STARVATION 1 Is a Functionally Conserved Protein Promoting Gravitropic Responses in Plants by Forming Starch Granules
Source: Frontiers journal article supplement (doi:10.3389/fpls.2021.628948), 2021-07-23
Supplement: Data_Sheet_2.PDF [file Data_Sheet_2.PDF]

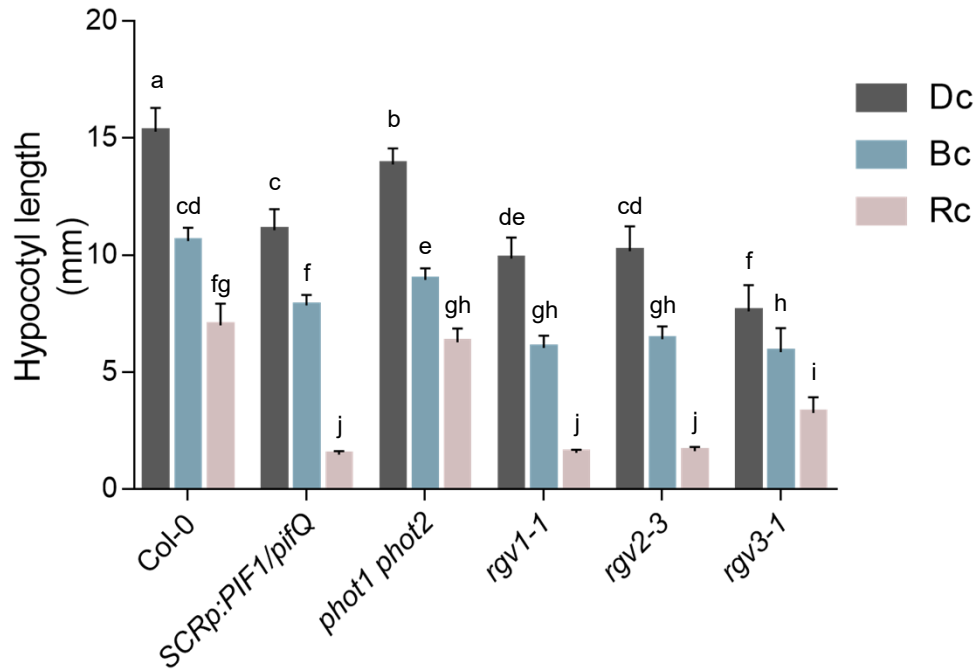

**Supplemental Figure 2. Hypocotyl lengths of *rgv* mutants.**

Hypocotyl lengths of 4-d-old seedlings grown in the dark (Dc), blue light (Bc; 1  $\mu\text{mol}/\text{m}^2\text{s}$ ), or red light (Rc; 20  $\mu\text{mol}/\text{m}^2\text{s}$ ) were measured. Letters indicate statistical significance determined by an ANOVA with Tukey's HSD post-hoc test for multiple comparisons ( $p < 0.01$ ). Error bars=SEM (n = 15).
