# Supplementary material for: EARLY STARVATION 1 Is a Functionally Conserved Protein Promoting Gravitropic Responses in Plants by Forming Starch Granules
Source: Frontiers journal article supplement (doi:10.3389/fpls.2021.628948), 2021-07-23
Supplement: Data_Sheet_4.PDF [file Data_Sheet_4.PDF]

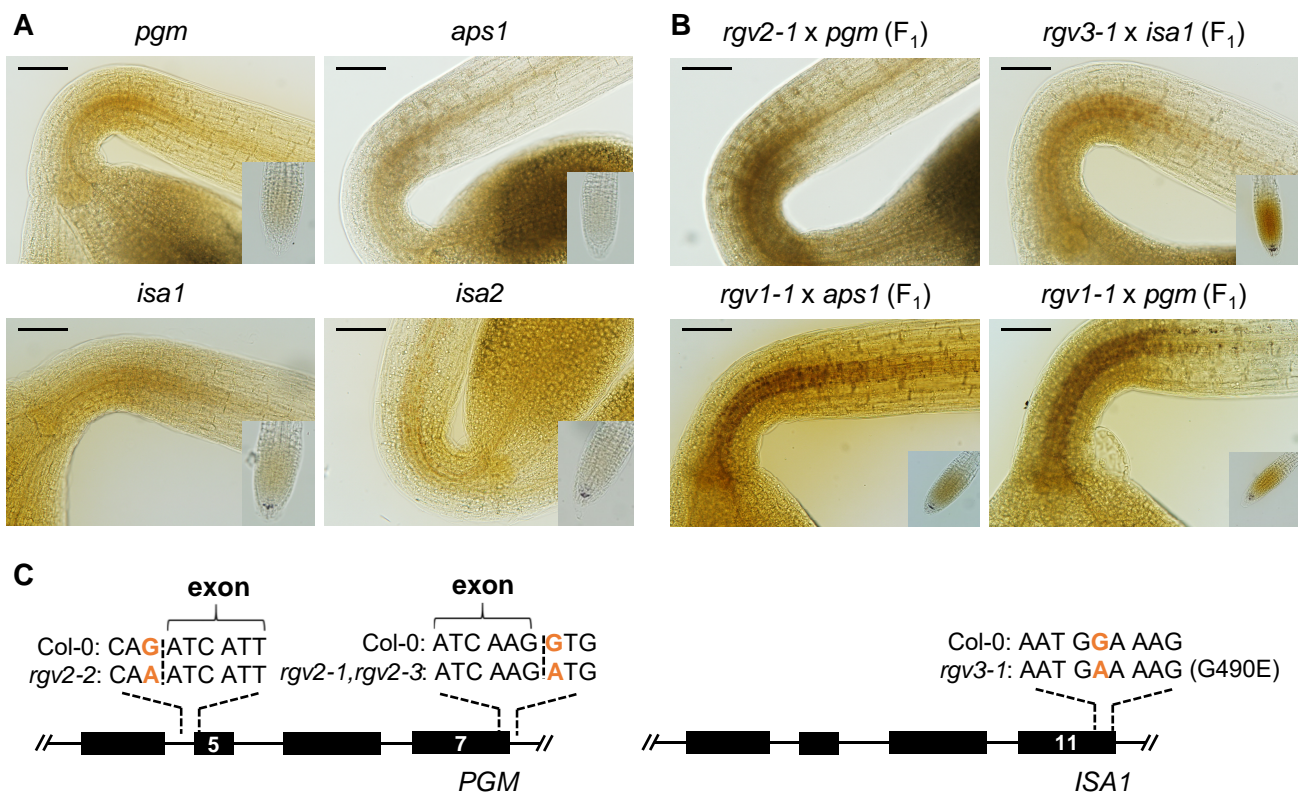

**Supplemental Figure 4. *rgv2* and *rgv3* mutants have mutations in *PGM* and *ISA1*, respectively.**

**(A)** Starchless phenotypes in four starch biosynthetic mutants. Starch granules were visualized by staining 3-day-old dark-grown mutant seedlings with Lugol's iodine. Insets show starch granules in root columella. *pgm*: *pgm-1*, *aps1*: *Salk\_040155*, *isa1*: *Salk\_117080*, *isa2*: *Salk\_029442*. Scale bar = 100µm.

**(B)** Complementation test between the three starchless *rgv* mutants and these starch biosynthetic mutants. The three *rgv* mutants were crossed with *pgm*, *aps1*, and *isa1* and the starch granules in 3-day-old dark-grown F<sub>1</sub> progeny were visualized by staining with Lugol's iodine. Scale bar = 100µm.

**(C)** Mutation loci for the *rgv2* and *rgv3* mutants. The genomic regions of the starch biosynthetic genes from three *rgv* mutants were amplified and sequenced. Partial gene structures of *PGM* and *ISA1* as well as the nucleotide sequences near each mutated locus (red-colored) are shown for the *rgv2* and *rgv3* mutant alleles. Black bars: exons, Lines: introns, Numbers in black bars: exon number.
