# Supplementary material for: EARLY STARVATION 1 Is a Functionally Conserved Protein Promoting Gravitropic Responses in Plants by Forming Starch Granules
Source: Frontiers journal article supplement (doi:10.3389/fpls.2021.628948), 2021-07-23
Supplement: Data_Sheet_11.PDF [file Data_Sheet_11.PDF]

**Supplemental Table 1. The comparison of Arabidopsis and rice *esv1* mutant phenotypes.**

| <b><i>esv1</i> mutant phenotype</b> | <b>Arabidopsis</b> | <b>Rice</b>                        |
|-------------------------------------|--------------------|------------------------------------|
| Leaf                                | Normal             | Reduced                            |
| Root tip                            | Absent             | Absent                             |
| Hypocotyl endodermis                | Absent             | -                                  |
| Grain                               | -                  | Reduced<br>Loosely packed granules |
